# Supplementary material
Source: PubMed Central journal article supplement (PMC3226933)

## **SUPPLEMENTAL MATERIAL**

### **EXPANDED METHODS**

#### **Artery Procurement**

Human epicardial coronary arteries were procured from explanted hearts in the operating room. The vessels were exposed to minimal warm ischemia by the use of intra-arterial and/or topical perfusion with ice-cold saline. Cold ischemic times required for coronary artery excision after rapid cardiectomy were <15 min. The right coronary artery from ostium to crux was used for organ culture experiments since this vessel segment tapers minimally in its course and yielded relatively uniform size artery rings. Variability of clinical specimens was taken into account by the use of multiple replicates, randomly distributed between experimental groups, as well as by the use of multiple donors. The left coronary artery and the root, ascending, and descending segments of the thoracic aorta were minced for explant outgrowth of SMC.

#### **Cell Culture**

Isolated cells were serially cultured and expanded using M199 supplemented with 20% FBS (Invitrogen) for SMC and venous EC, EGM-2-MV with 5% FBS for arterial EC, and DMEM with 10% FBS for fibroblasts. Venous EC cultures were also supplemented with 50  $\mu\text{g}/\text{mL}$  ECGS (BD Biosciences) and 100  $\mu\text{g}/\text{mL}$  heparin (Sigma-Aldrich). The cells were used for experiments after 2-3 passages.

#### **Histology and Immunohistochemistry**

Artery segments were embedded in OCT compound and 5  $\mu\text{m}$ -thick transverse sections were stained with hematoxylin and eosin or elastin-Van Gieson using standard techniques to identify the vascular layers. Immunolabeling was performed with the following primary

antibodies: mouse anti-human LAP- $\beta$ 1 (clone 27235, R&D Systems) and rabbit anti-pan TGF- $\beta$  (mixture of human TGF- $\beta$ 1, porcine TGF- $\beta$ 1.2, porcine TGF- $\beta$ 2, and amphibian TGF- $\beta$ 5, cat. # AB-100-NA, R&D Systems). Isotype-matched, irrelevant IgG were used as negative controls. Binding of secondary antibodies (Jackson ImmunoResearch, West Grove, PA) was detected with vectastain ABC reagent and AEC peroxidase substrate kits (Vector Laboratories, Burlingame, CA). The sections were counter-stained with hematoxylin (Sigma-Aldrich). Images were acquired using an Axioskop2 plus microscope (Carl Zeiss MicroImaging, Thornwood, NY).

### **Immunofluorescence Microscopy**

Immunolabeling of 5  $\mu$ m-thick, OCT-embedded artery sections was performed with mouse anti-human LAP- $\beta$ 1 (clone 27235, R&D Systems), rabbit anti-human CD45 (Santa Cruz Biotechnology), rabbit anti-human CD3 (DAKO), rabbit anti-human  $\alpha$ -smooth muscle actin (Abcam), and goat anti-human CD31 (Santa Cruz Biotechnology). Detection of primary antibodies was visualized with Alexa Fluor 594-conjugated donkey anti-mouse IgG, Alexa Fluor 488-conjugated donkey anti-goat IgG, and Alexa Fluor 488-conjugated donkey anti-rabbit IgG (Invitrogen). The specimens were mounted with ProLong Gold antifade reagent with DAPI for nuclei labeling (Invitrogen). Images were acquired using an Axiovert 200M microscopy system and processed using AxioVision 4.6 software (Carl Zeiss MicroImaging).

### **Apoptosis Assay and Flow Cytometry**

SMC were pretreated with IFN- $\gamma$  (Invitrogen) at 50 ng/mL for 72 hr, washed, and then treated with IL-11 (R&D Systems) at 5 ng/mL for 24 hr. To augment apoptosis, the cells were treated with multimeric, recombinant TRAIL (PeproTech) at 40 ng/mL for 24 hr. To evaluate apoptosis, adherent and floating SMC were collected and labeled using a buffer solution and PE-

conjugated annexin V (BD Pharmingen) according to the manufacturer's instructions. Analysis was performed using a LSR II (BD Biosciences).

## **ELISA**

Cytokine levels in culture supernatants and artery/cell lysates were determined using sandwich ELISA Duoset kits (R&D Systems) for TGF- $\beta$ 1, IL-6, IL-8, IL-10, IL-11, and IFN- $\gamma$  according to the manufacturer's instructions. Cell lysates were prepared after washing in PBS, adding RIPA lysis buffer (Sigma-Aldrich) and detaching the cells with a scraper, centrifuging the mixture at 14,000 g for 15 min at 4 °C, and the supernatant was removed for analysis. Lysates were prepared from coronary artery rings by crushing the specimens on dry ice, adding RIPA lysis buffer, briefly sonicating the sample followed by overnight agitation at 4 °C on a rocker, centrifuging at 14,000 g for 15 min at 4 °C, and the supernatant was removed for analysis.

## **Immunoblotting**

Protein was extracted from cells using RIPA lysis buffer with a protease inhibitor cocktail (Thermo Scientific, Rockford, IL) and boiled in SDS sample buffer for 5 min. Equal amounts of protein per sample were separated by SDS-polyacrylamide gel electrophoresis, transferred electrophoretically to a nitrocellulose membrane (Bio-Rad Laboratories, Hercules, CA), and blotted with rabbit anti-human TGF- $\beta$ 1 (clone 56E4, Cell Signaling Technology, Beverly, MA), rabbit anti-human Ser465/467 phospho-SMAD2 (cat. #3101, Cell Signaling Technology), mouse anti-human SMAD2 (clone L16D3, Cell Signaling Technology), or mouse anti- $\beta$ -actin (clone AC-15, Sigma-Aldrich), followed by horseradish peroxidase-conjugated secondary antibodies (Jackson ImmunoResearch). Bound antibody was detected with Western Lightning Plus-ECL (Perkin Elmer, Waltham, MA).

### **Real-time Quantitative RT-PCR**

Serial sections of OCT-embedded arteries or centrifuged cell pellets were immersed in RLT lysis buffer (QIAGEN, Valencia, CA), vigorously vortexed, and total RNA was isolated using RNeasy Mini kits (QIAGEN) according to the manufacturer's protocol. RT with random hexamer and oligo-dT primers was performed according to the Multiscribe RT system protocol (Applied Biosystems, Foster City, CA). RT-PCR reactions were prepared with TaqMan PCR Master Mix, predeveloped assay reagents, and probes (Applied Biosystems). Samples were analyzed on an iCycler (Bio-Rad Laboratories). RNA samples processed without the RT enzyme were used as negative controls.

### **Microarray Analysis**

SMC were cultured from 3 different thoracic aortic segments of 4 donors, deprived of serum in M199 medium for 48 hr, and remained untreated ( $n=12$ ) or were treated with TGF- $\beta$  ( $n=12$ ) at 1 ng/mL for 6 hr. Preparation of sscDNA and hybridization to the human genechip set (1.0 ST Array) were performed according to the manufacturer's protocol (Affymetrix). The stained chips were read and analyzed with GeneChip Scanner 3000 (Affymetrix). Expression intensities were quantified and compared using Partek Genomics Suite v6.4 (Partek Inc., St. Louis, MO) with Robust Multi-Array Average for normalization and fold-change calculations. For the purposes of this study, genes that were regulated by TGF- $\beta$  more than 2-fold relative to untreated controls with  $P$  values  $<0.05$  by  $t$  test, after filtering for False Discovery Rate to correct for multiple comparisons, were considered significant. The primary microarray data have been deposited in the Gene Expression Omnibus under accession no. GSE30004.

## SUPPLEMENTAL FIGURE LEGENDS

### **Supplemental Figure 1. LAP expression by intrinsic vascular cells and infiltrating**

**leukocytes.** Human coronary arteries were analyzed by immunofluorescence analysis using antibodies to LAP (red color) and (A) the EC marker CD31 (green color), (B) the SMC marker smooth muscle  $\alpha$ -actin (SMA) (green color), (C) the pan-leukocyte marker CD45 (green color), or (D) the T cell marker CD3. Examples of double labeled cells in the merged panels are marked with arrows (bar=30  $\mu$ m).

### **Supplemental Figure 2. Altered cytokine production after artery procurement and *ex vivo***

**culture.** Human coronary arteries were divided into 3 mm rings and either immediately frozen (0 hr) or cultured in serum-free medium for 72 hr. (A) Total TGF- $\beta$ 1 and (B) IL-6 levels of artery lysates were measured by ELISA ( $n=5$ ) at 72 hr. \* $P<0.05$ , 72 hr vs. 0 hr, t-test.

### **Supplemental Figure 3. Arterial expression of TGF- $\beta$ is not modulated by treatment with**

**pro-inflammatory cytokines.** Human coronary arteries were divided into 3 mm rings and either immediately frozen (0 hr) or cultured in serum-free medium and treated with IL-1 $\alpha$  at 10 ng/mL, TNF- $\alpha$  at 10 ng/mL, IFN- $\gamma$  at 30 ng/mL, or IL-17 at 30 ng/mL. (A) Total TGF- $\beta$ 1 and (B) IL-6 levels were measured by ELISA ( $n=6$ ) at 72 hr. + $P<0.05$ , vs. 0 hr, one-way ANOVA.

### **Supplemental Figure 4. SMC differentiation markers are decreased after artery**

**procurement and *ex vivo* culture.** Human coronary arteries were divided into 3 mm rings and either immediately frozen (0 hr) for which treatment was not applicable (NA) or cultured in serum-free medium and treated or not with TGF- $\beta$ 1 at 10 ng/mL for 6-24 hr. (A) Smooth muscle myosin heavy chain 11 (MYH11) and (B) smooth muscle  $\alpha$ -actin (SMA) transcript expression

(normalized to GAPDH) were measured by quantitative RT-PCR ( $n=2-4$ ).  $^+P<0.05$ , Cultured vs. Not cultured (0 hr), one-way ANOVA.

**Supplemental Figure 5. TGF- $\beta$  expression in cultured cells.** Arterial EC from multiple donors were cultured in serum-free medium and treated or not with PMA/ionomycin for 6 hr. Total TGF- $\beta$ 1 and  $\beta$ -actin of cell lysates was determined by western blotting and the relative protein expression was assessed by densitometry ( $n=3$ );  $*P<0.05$ , PMA/ionomycin vs. Untreated, ANOVA.

**Supplemental Figure 6. TGF- $\beta$  responses in cultured cells.** (A) Arterial EC, SMC, and fibroblast were treated with TGF- $\beta$ 1 at the concentrations indicated for 30 min under serum-free conditions and phospho-SMAD2 and  $\beta$ -actin expression were assessed by western blotting.

**Supplemental Figure 7. TGF- $\beta$  induces IL-11 production in cultured arteries and correlates with IL-11 expression in non-diseased and arteriosclerotic arteries.** (A) Human coronary arteries were divided into 3 mm rings and either immediately frozen (0 hr) for which treatment was not applicable (NA) or cultured in serum-free medium and treated or not with TGF- $\beta$ 1 at 10 ng/mL for 6-18 hr. IL-11 transcript expression (normalized to GAPDH) was measured by quantitative RT-PCR ( $n=2-4$ ).  $^+P<0.05$ , Cultured vs. Not cultured (0 hr), one-way ANOVA and  $*P<0.05$ , TGF- $\beta$ 1-treated vs. Untreated, one-way ANOVA. (B) Quantitative RT-PCR analysis of IL-11 transcripts normalized to GAPDH in non-arteriosclerotic ( $n=4$  donors) and arteriosclerotic ( $n=9$  donors) coronary arteries.

## SUPPLEMENTAL TABLES

**Supplemental Table I.** Clinical characteristics of individuals with non-arteriosclerotic and arteriosclerotic coronary arteries\*

| Characteristic                | Non-arteriosclerotic | Arteriosclerotic | <i>P</i> value |
|-------------------------------|----------------------|------------------|----------------|
| Age (yr)                      | 44.0±8.4             | 57.4±5.0         | 0.1755         |
| Gender (# male:female)        | 2:2                  | 6:3              | 1.0000         |
| Race (# Caucasian:other)      | 2:2                  | 7:2              | 0.2028         |
| Operation (# donor:recipient) | 2:2                  | 4:5              | 1.0000         |

\*Human coronary arteries were procured at donor and recipient cardiac transplantation

operations from 13 individuals and classified as non-arteriosclerotic or arteriosclerotic based on macroscopic characteristics. The age, gender, race, and type of operation were compared by t test or Fisher's exact test.

Supplemental Table II. TGF- $\beta$ -inducible genes in cultured SMC\*

| Transcript ID | Gene Assignment                                                                           | Gene Symbol | Fold-Change (T) | P-value (TGF- $\beta$ ) | FDR-adj P-value | TGF- $\beta$ -treated (I) | Untreated (Mea) |
|---------------|-------------------------------------------------------------------------------------------|-------------|-----------------|-------------------------|-----------------|---------------------------|-----------------|
| 8156919       | NM_001018116 // MURC // muscle-related coiled-coil protein // 9q31.1 // 347273 /          | MURC        | 4.72            | 0.000000                | 0.000000        | 369.2                     | 78.3            |
| 8109159       | NR_027180 // LOC728264 // hypothetical LOC728264 // 5q32 // 728264                        | LOC728264   | 4.37            | 0.000034                | 0.000049        | 521.7                     | 119.4           |
| 7918857       | NM_005725 // TSPAN2 // tetraspanin 2 // 1p13.2 // 10100 // ENST00000369516 // T           | TSPAN2      | 3.88            | 0.000000                | 0.000000        | 1538.2                    | 396.4           |
| 7950933       | NR_026571 // NOX4 // NADPH oxidase 4 // 11q14.2-q21 // 50507 // NM_016931 // N            | NOX4        | 3.88            | 0.000001                | 0.000002        | 370.3                     | 95.5            |
| 8039484       | NM_000641 // IL11 // interleukin 11 // 19q13.3-q13.4 // 3589 // ENST00000264563           | IL11        | 3.50            | 0.000391                | 0.000415        | 2503.6                    | 715.7           |
| 8095043       | NM_023940 // RASL11B // RAS-like, family 11, member B // 4q12 // 65997 // ENST0           | RASL11B     | 3.07            | 0.000123                | 0.000145        | 237.7                     | 77.4            |
| 8029693       | NM_006732 // FOSB // FBJ murine osteosarcoma viral oncogene homolog B // 19q1:            | FOSB        | 3.06            | 0.000000                | 0.000000        | 512.3                     | 167.6           |
| 8004691       | NM_203411 // TMEM88 // transmembrane protein 88 // 17p13.1 // 92162 // ENST000            | TMEM88      | 3.06            | 0.000006                | 0.000009        | 1377.8                    | 450.8           |
| 8114805       | NM_000800 // FGF1 // fibroblast growth factor 1 (acidic) // 5q31 // 2246 // NM_           | FGF1        | 3.00            | 0.000002                | 0.000003        | 346.2                     | 115.6           |
| 8175256       | NR_024607 // MGC16121 // hypothetical protein MGC16121 // Xq26.3 // 84848                 | MGC16121    | 2.98            | 0.000000                | 0.000001        | 727.8                     | 243.9           |
| 7942064       | NM_015973 // GAL // galanin prepropeptide // 11q13.3 // 51083 // ENST0000026564           | GAL         | 2.98            | 0.000128                | 0.000147        | 1000.7                    | 335.9           |
| 8123246       | NM_021977 // SLC22A3 // solute carrier family 22 (extraneuronal monoamine transp          | SLC22A3     | 2.97            | 0.000105                | 0.000127        | 885.6                     | 297.8           |
| 7951284       | NM_002422 // MMP3 // matrix metalloproteinase 3 (stromelysin 1, progelatinase) //         | MMP3        | 2.96            | 0.000130                | 0.000147        | 298.4                     | 100.9           |
| 8063382       | NM_005985 // SNAI1 // snail homolog 1 (Drosophila) // 20q13.1-q13.2 // 6615 //            | SNAI1       | 2.91            | 0.000001                | 0.000001        | 2702.2                    | 927.2           |
| 8177222       | NM_013230 // CD24 // CD24 molecule // 6q21 // 100133941 // ENST00000382840 //             | CD24        | 2.91            | 0.000238                | 0.000258        | 197.1                     | 67.7            |
| 8038890       | NM_001523 // HAS1 // hyaluronan synthase 1 // 19q13.4 // 3036 // ENST000002221            | HAS1        | 2.85            | 0.000022                | 0.000033        | 433.5                     | 152.3           |
| 7984802       | NM_001130136 // ISLR2 // immunoglobulin superfamily containing leucine-rich repe          | ISLR2       | 2.80            | 0.000001                | 0.000002        | 284.4                     | 101.5           |
| 7924977       | NM_024554 // PGBD5 // piggyBac transposable element derived 5 // 1q42.13 // 7960          | PGBD5       | 2.78            | 0.000000                | 0.000000        | 327.1                     | 117.7           |
| 7968556       | NM_004795 // KL // klotho // 13q12 // 9365 // ENST00000380099 // KL // klotho /           | KL          | 2.68            | 0.000000                | 0.000001        | 333.3                     | 124.6           |
| 7989750       | NM_003613 // CILP // cartilage intermediate layer protein, nucleotide pyrophosph          | CILP        | 2.66            | 0.000002                | 0.000004        | 209.4                     | 78.7            |
| 7908312       | NM_005807 // PRG4 // proteoglycan 4 // 1q25-q31 // 10216 // NM_001127708 // PR            | PRG4        | 2.65            | 0.000010                | 0.000015        | 2602.9                    | 983.5           |
| 8114572       | NM_001945 // HBEGF // heparin-binding EGF-like growth factor // 5q23 // 1839 //           | HBEGF       | 2.64            | 0.000000                | 0.000000        | 6299.0                    | 2381.7          |
| 8004671       | NM_001080424 // KDM6B // lysine (K)-specific demethylase 6B // 17p13.1 // 23135           | KDM6B       | 2.54            | 0.000000                | 0.000000        | 1808.2                    | 711.4           |
| 8024485       | NM_015675 // GADD45B // growth arrest and DNA-damage-inducible, beta // 19p13.            | GADD45B     | 2.53            | 0.000000                | 0.000000        | 931.9                     | 367.9           |
| 8112045       | NM_007036 // ESM1 // endothelial cell-specific molecule 1 // 5q11.2 // 11082 //           | ESM1        | 2.52            | 0.001844                | 0.001880        | 325.8                     | 129.1           |
| 8067233       | NM_020182 // PMEPA1 // prostate transmembrane protein, androgen induced 1 // 20           | PMEPA1      | 2.51            | 0.000000                | 0.000000        | 1614.6                    | 642.9           |
| 8070665       | NM_173354 // SIK1 // salt-inducible kinase 1 // 21q22.3 // 150094 // ENST000000           | SIK1        | 2.51            | 0.000000                | 0.000000        | 805.7                     | 321.6           |
| 7930482       | NM_000681 // ADRA2A // adrenergic, alpha-2A-, receptor // 10q24-q26 // 150 // A           | ADRA2A      | 2.50            | 0.000048                | 0.000065        | 756.9                     | 302.6           |
| 8077499       | AF086709 // LOH3CR2A // loss of heterozygosity, 3, chromosomal region 2, gene A           | LOH3CR2A    | 2.50            | 0.000001                | 0.000001        | 166.4                     | 66.6            |
| 8129562       | NM_001901 // CTGF // connective tissue growth factor // 6q23.1 // 1490 // ENST0           | CTGF        | 2.49            | 0.000104                | 0.000127        | 8171.6                    | 3283.2          |
| 8004360       | NM_001002914 // KCTD11 // potassium channel tetramerisation domain containing 1           | KCTD11      | 2.44            | 0.000000                | 0.000000        | 1313.9                    | 538.7           |
| 7962000       | NM_198965 // PTHLH // parathyroid hormone-like hormone // 12p12.1-p11.2 // 5744           | PTHLH       | 2.43            | 0.000077                | 0.000100        | 468.3                     | 192.8           |
| 7951259       | NM_002425 // MMP10 // matrix metalloproteinase 10 (stromelysin 2) // 11q22.3 // 4         | MMP10       | 2.40            | 0.000194                | 0.000215        | 328.0                     | 136.9           |
| 8092839       | NM_001135057 // LRRC15 // leucine rich repeat containing 15 // 3q29 // 131578 //          | LRRC15      | 2.39            | 0.000000                | 0.000001        | 910.0                     | 380.9           |
| 8077490       | NM_014583 // LMCD1 // LIM and cysteine-rich domains 1 // 3p26-p24 // 29995 // E           | LMCD1       | 2.38            | 0.000000                | 0.000000        | 2143.7                    | 900.3           |
| 7962375       | NM_153026 // PRICKLE1 // prickle homolog 1 (Drosophila) // 12q12 // 144165 // N           | PRICKLE1    | 2.34            | 0.000051                | 0.000068        | 1471.2                    | 628.7           |
| 8133360       | NM_001305 // CLDN4 // claudin 4 // 7q11.23 // 1364 // ENST00000435050 // CLDN4            | CLDN4       | 2.34            | 0.000000                | 0.000000        | 490.6                     | 209.7           |
| 8121257       | NM_001198 // PRDM1 // PR domain containing 1, with ZNF domain // 6q21-q22.1 // $\epsilon$ | PRDM1       | 2.34            | 0.000002                | 0.000004        | 373.2                     | 159.6           |
| 8063634       | ENST00000419204 // MGC4294 // hypothetical protein MGC4294 // 20q13.32 // 791 $\epsilon$  | MGC4294     | 2.33            | 0.000002                | 0.000003        | 480.4                     | 205.9           |
| 8123936       | NM_001142393 // NEDD9 // neural precursor cell expressed, developmentally down-           | NEDD9       | 2.29            | 0.000002                | 0.000004        | 326.1                     | 142.1           |
| 8026047       | NM_002229 // JUNB // jun B proto-oncogene // 19p13.2 // 3726 // ENST0000030275            | JUNB        | 2.28            | 0.000000                | 0.000000        | 3551.0                    | 1559.6          |
| 8021169       | NM_006033 // LIPG // lipase, endothelial // 18q21.1 // 9388 // ENST00000261292            | LIPG        | 2.26            | 0.000088                | 0.000112        | 402.7                     | 178.2           |
| 8092707       | NM_018192 // LEPREL1 // leprecan-like 1 // 3q28 // 55214 // NM_001134418 // LEP           | LEPREL1     | 2.26            | 0.000006                | 0.000010        | 192.7                     | 85.3            |
| 8104663       | NM_004932 // CDH6 // cadherin 6, type 2, K-cadherin (fetal kidney) // 5p15.1-p14          | CDH6        | 2.23            | 0.004330                | 0.004330        | 925.1                     | 415.7           |
| 8122734       | NM_030949 // PPP1R14C // protein phosphatase 1, regulatory (inhibitor) subunit 1          | PPP1R14C    | 2.19            | 0.000038                | 0.000053        | 799.6                     | 365.7           |
| 8041206       | NM_030915 // LBH // limb bud and heart development homolog (mouse) // 2p23.1 //           | LBH         | 2.11            | 0.000000                | 0.000001        | 1353.8                    | 640.3           |
| 7929145       | NM_182765 // HECTD2 // HECT domain containing 2 // 10q23.32 // 143279 // NM_1             | HECTD2      | 2.11            | 0.000003                | 0.000005        | 829.9                     | 393.3           |
| 8023995       | NM_005860 // FSTL3 // follistatin-like 3 (secreted glycoprotein) // 19p13 // 102          | FSTL3       | 2.06            | 0.000000                | 0.000000        | 2331.3                    | 1133.8          |
| 8083876       | NM_005414 // SKIL // SKI-like oncogene // 3q26 // 6498 // NM_001145098 // SKIL            | SKIL        | 2.03            | 0.000000                | 0.000000        | 2732.5                    | 1345.2          |
| 7979710       | NM_016445 // PLEK2 // pleckstrin 2 // 14q23.3 // 26499 // ENST00000216446 // PL           | PLEK2       | 2.01            | 0.000000                | 0.000000        | 948.9                     | 472.0           |
| 8112202       | NM_006622 // PLK2 // polo-like kinase 2 (Drosophila) // 5q12.1-q13.2 // 10769 //          | PLK2        | -2.12           | 0.001467                | 0.001525        | 436.9                     | 924.9           |
| 8129937       | NM_006079 // CITED2 // Cbp/p300-interacting transactivator, with Glu/Asp-rich ca          | CITED2      | -2.27           | 0.000004                | 0.000006        | 1141.8                    | 2588.9          |

\*Microarray analysis of SMC  $\pm$  TGF- $\beta$ 1 at 1 ng/mL x6 hr ( $n=12$ ) in serum-free medium. Mean, fold-change ( $>$  or  $<2x$ ),  $P$  value ( $<0.05$  t test) after false discovery rate (FDR) adjustment were calculated.



|      |      |      |      |      |      |      |      |      |       |      |      |      |      |      |      |      |      |      |      |      |      |      |      |
|------|------|------|------|------|------|------|------|------|-------|------|------|------|------|------|------|------|------|------|------|------|------|------|------|
| 220  | 227  | 922  | 529  | 254  | 461  | 851  | 656  | 154  | 272   | 222  | 431  | 174  | 87   | 96   | 59   | 66   | 75   | 49   | 65   | 74   | 60   | 91   | 95   |
| 616  | 845  | 639  | 332  | 778  | 1174 | 906  | 260  | 267  | 890   | 364  | 198  | 469  | 186  | 95   | 60   | 230  | 201  | 216  | 72   | 52   | 196  | 57   | 40   |
| 2027 | 1125 | 2232 | 1644 | 1615 | 1509 | 2225 | 2052 | 1158 | 1036  | 1072 | 1466 | 1656 | 382  | 567  | 337  | 365  | 376  | 247  | 227  | 481  | 277  | 387  | 315  |
| 476  | 336  | 462  | 421  | 248  | 186  | 656  | 460  | 214  | 382   | 507  | 371  | 419  | 98   | 67   | 103  | 60   | 67   | 73   | 57   | 87   | 172  | 95   | 86   |
| 2959 | 4243 | 1692 | 1751 | 3121 | 2614 | 2151 | 1241 | 5593 | 5346  | 1672 | 1498 | 2607 | 1564 | 408  | 536  | 559  | 376  | 347  | 236  | 3239 | 2095 | 585  | 297  |
| 581  | 266  | 110  | 189  | 269  | 234  | 363  | 292  | 148  | 460   | 73   | 310  | 359  | 64   | 65   | 79   | 72   | 52   | 66   | 64   | 71   | 75   | 59   | 78   |
| 316  | 509  | 728  | 541  | 429  | 357  | 716  | 495  | 482  | 542   | 638  | 568  | 270  | 143  | 168  | 173  | 153  | 127  | 167  | 145  | 203  | 144  | 182  | 175  |
| 918  | 1609 | 1519 | 987  | 2105 | 1421 | 1527 | 701  | 2802 | 1956  | 1226 | 982  | 795  | 422  | 464  | 300  | 625  | 413  | 385  | 273  | 1054 | 501  | 365  | 288  |
| 380  | 314  | 297  | 425  | 214  | 376  | 294  | 213  | 360  | 608   | 304  | 588  | 397  | 98   | 76   | 116  | 68   | 89   | 112  | 87   | 95   | 133  | 116  | 188  |
| 772  | 531  | 1389 | 716  | 463  | 758  | 1041 | 557  | 529  | 885   | 874  | 649  | 648  | 168  | 314  | 236  | 205  | 266  | 243  | 205  | 196  | 252  | 242  | 168  |
| 768  | 655  | 1137 | 1088 | 2395 | 942  | 1940 | 741  | 1187 | 748   | 732  | 769  | 709  | 197  | 364  | 251  | 1322 | 166  | 384  | 284  | 642  | 200  | 247  | 211  |
| 330  | 936  | 1173 | 705  | 1492 | 1145 | 1413 | 527  | 1604 | 1062  | 643  | 653  | 310  | 376  | 281  | 164  | 625  | 483  | 313  | 151  | 667  | 383  | 143  | 173  |
| 346  | 466  | 236  | 154  | 163  | 109  | 326  | 147  | 273  | 698   | 1169 | 450  | 306  | 121  | 111  | 68   | 76   | 45   | 66   | 71   | 80   | 135  | 338  | 66   |
| 2124 | 3552 | 2265 | 2170 | 2629 | 3220 | 2471 | 2186 | 3997 | 3667  | 2453 | 2486 | 1761 | 1475 | 577  | 690  | 732  | 692  | 618  | 433  | 2165 | 1681 | 934  | 848  |
| 103  | 203  | 114  | 125  | 268  | 78   | 248  | 149  | 290  | 666   | 154  | 504  | 77   | 77   | 34   | 56   | 32   | 52   | 25   | 45   | 50   | 225  | 96   | 419  |
| 175  | 418  | 604  | 334  | 538  | 577  | 741  | 220  | 969  | 736   | 354  | 234  | 146  | 134  | 175  | 120  | 134  | 143  | 157  | 129  | 322  | 195  | 129  | 120  |
| 119  | 246  | 400  | 294  | 280  | 410  | 583  | 385  | 259  | 362   | 152  | 220  | 119  | 78   | 123  | 87   | 88   | 160  | 101  | 91   | 143  | 113  | 85   | 69   |
| 244  | 313  | 469  | 323  | 338  | 205  | 348  | 274  | 411  | 363   | 384  | 342  | 235  | 120  | 126  | 100  | 111  | 91   | 107  | 80   | 156  | 107  | 144  | 96   |
| 197  | 272  | 441  | 422  | 646  | 626  | 588  | 468  | 268  | 208   | 136  | 222  | 192  | 113  | 136  | 122  | 259  | 157  | 112  | 101  | 134  | 95   | 73   | 92   |
| 200  | 151  | 135  | 207  | 364  | 167  | 382  | 422  | 244  | 183   | 80   | 240  | 141  | 58   | 70   | 62   | 112  | 69   | 92   | 109  | 77   | 66   | 65   | 61   |
| 2954 | 1884 | 3980 | 3969 | 3519 | 4382 | 4471 | 2241 | 1994 | 1394  | 1848 | 1388 | 2828 | 694  | 1818 | 1186 | 1473 | 1992 | 1539 | 761  | 640  | 324  | 689  | 394  |
| 2791 | 6278 | 7975 | 6350 | 6145 | 5089 | 7725 | 5444 | 8008 | 8493  | 7354 | 6683 | 2301 | 2550 | 3027 | 2151 | 2176 | 1620 | 1637 | 1129 | 4829 | 3820 | 3399 | 2137 |
| 1389 | 1846 | 1720 | 1772 | 2320 | 1664 | 2102 | 1526 | 2710 | 2105  | 1465 | 1510 | 1243 | 682  | 655  | 593  | 887  | 554  | 556  | 508  | 1308 | 667  | 669  | 630  |
| 880  | 716  | 1050 | 908  | 991  | 876  | 1250 | 977  | 1025 | 764   | 828  | 1038 | 712  | 301  | 368  | 307  | 351  | 300  | 334  | 327  | 486  | 392  | 368  | 314  |
| 388  | 884  | 195  | 885  | 119  | 264  | 408  | 155  | 263  | 765   | 243  | 247  | 339  | 550  | 84   | 583  | 63   | 70   | 46   | 54   | 93   | 276  | 77   | 112  |
| 1543 | 1547 | 1408 | 1583 | 1716 | 1521 | 2206 | 1714 | 1823 | 2014  | 1074 | 1517 | 1380 | 624  | 496  | 479  | 605  | 597  | 617  | 527  | 856  | 779  | 521  | 597  |
| 437  | 778  | 849  | 591  | 826  | 560  | 988  | 854  | 1492 | 1173  | 748  | 858  | 345  | 295  | 336  | 230  | 296  | 220  | 297  | 281  | 627  | 443  | 312  | 329  |
| 1093 | 529  | 717  | 710  | 1032 | 942  | 1436 | 1600 | 683  | 425   | 323  | 573  | 1021 | 326  | 230  | 239  | 207  | 499  | 191  | 433  | 337  | 185  | 210  | 288  |
| 169  | 210  | 189  | 146  | 137  | 226  | 179  | 116  | 126  | 277   | 144  | 143  | 158  | 84   | 71   | 63   | 42   | 60   | 36   | 42   | 77   | 109  | 57   | 71   |
| 8190 | 9674 | 9088 | 8559 | 5288 | 8843 | 9324 | 9029 | 3778 | 12153 | 8431 | 9437 | 7581 | 5898 | 3355 | 3081 | 1347 | 3139 | 2616 | 2076 | 1419 | 8775 | 3945 | 3012 |
| 1014 | 1362 | 1312 | 1050 | 1176 | 1584 | 1826 | 1164 | 1315 | 1911  | 1227 | 1139 | 850  | 592  | 538  | 447  | 500  | 550  | 427  | 393  | 647  | 593  | 519  | 537  |
| 387  | 505  | 267  | 902  | 310  | 620  | 306  | 299  | 454  | 669   | 823  | 537  | 372  | 135  | 139  | 439  | 140  | 204  | 188  | 149  | 190  | 151  | 334  | 113  |
| 578  | 331  | 289  | 335  | 267  | 126  | 313  | 219  | 299  | 347   | 844  | 413  | 569  | 142  | 99   | 132  | 132  | 71   | 84   | 101  | 121  | 106  | 227  | 179  |
| 851  | 710  | 1088 | 876  | 1334 | 1533 | 1424 | 1009 | 630  | 695   | 647  | 672  | 798  | 292  | 377  | 254  | 517  | 643  | 359  | 345  | 354  | 338  | 237  | 359  |
| 1921 | 2165 | 2788 | 2151 | 1801 | 2421 | 2369 | 1879 | 1648 | 2623  | 1997 | 2256 | 1694 | 877  | 1094 | 933  | 769  | 799  | 651  | 528  | 1037 | 1163 | 872  | 843  |
| 1860 | 965  | 1257 | 917  | 2394 | 1884 | 2043 | 1280 | 1932 | 1752  | 1244 | 1001 | 1615 | 504  | 536  | 355  | 915  | 665  | 470  | 369  | 840  | 707  | 841  | 468  |
| 261  | 370  | 645  | 489  | 461  | 588  | 706  | 541  | 486  | 426   | 591  | 502  | 227  | 187  | 254  | 190  | 140  | 204  | 259  | 213  | 270  | 182  | 237  | 194  |
| 399  | 443  | 505  | 380  | 154  | 283  | 294  | 221  | 530  | 546   | 650  | 402  | 351  | 159  | 233  | 132  | 77   | 91   | 102  | 88   | 331  | 182  | 321  | 131  |
| 291  | 475  | 734  | 530  | 600  | 523  | 399  | 498  | 485  | 660   | 368  | 384  | 294  | 210  | 261  | 157  | 245  | 249  | 160  | 191  | 214  | 308  | 131  | 142  |
| 244  | 385  | 320  | 313  | 190  | 285  | 442  | 343  | 253  | 598   | 294  | 421  | 222  | 184  | 119  | 118  | 106  | 120  | 113  | 97   | 154  | 281  | 130  | 149  |
| 2427 | 3537 | 3679 | 3207 | 3783 | 3464 | 4539 | 3966 | 3857 | 3708  | 3580 | 3286 | 2102 | 1666 | 1586 | 1349 | 1642 | 1206 | 1486 | 1170 | 2440 | 1535 | 1700 | 1262 |
| 127  | 386  | 423  | 529  | 262  | 356  | 412  | 377  | 434  | 1118  | 329  | 716  | 112  | 151  | 175  | 169  | 141  | 145  | 119  | 131  | 287  | 482  | 183  | 253  |
| 219  | 260  | 184  | 159  | 94   | 171  | 177  | 111  | 153  | 296   | 332  | 329  | 147  | 136  | 54   | 80   | 61   | 63   | 55   | 48   | 77   | 104  | 140  | 147  |
| 1398 | 1569 | 411  | 1524 | 380  | 1559 | 567  | 412  | 824  | 1213  | 1691 | 1223 | 1203 | 849  | 173  | 714  | 161  | 565  | 119  | 154  | 476  | 639  | 638  | 654  |
| 980  | 738  | 932  | 794  | 844  | 642  | 999  | 450  | 1262 | 902   | 824  | 559  | 867  | 435  | 448  | 406  | 335  | 311  | 197  | 236  | 693  | 386  | 364  | 177  |
| 1486 | 1572 | 1443 | 1548 | 829  | 1067 | 1434 | 1116 | 1135 | 1580  | 1715 | 1669 | 1285 | 846  | 544  | 589  | 356  | 365  | 508  | 391  | 714  | 1132 | 831  | 786  |
| 1089 | 713  | 657  | 934  | 977  | 891  | 925  | 777  | 926  | 861   | 626  | 716  | 955  | 392  | 307  | 435  | 504  | 336  | 249  | 285  | 460  | 398  | 318  | 392  |
| 1724 | 2189 | 2600 | 2552 | 2041 | 2588 | 2685 | 2354 | 2467 | 2790  | 1899 | 2357 | 1679 | 950  | 1113 | 1183 | 1019 | 1209 | 1034 | 973  | 1490 | 1219 | 970  | 984  |
| 1933 | 2770 | 2616 | 2483 | 3481 | 3026 | 3450 | 2734 | 2995 | 2902  | 2374 | 2433 | 1747 | 1553 | 1316 | 1104 | 1576 | 970  | 1036 | 1103 | 1774 | 1760 | 1331 | 1227 |
| 622  | 903  | 874  | 893  | 958  | 1210 | 1312 | 966  | 675  | 1212  | 977  | 1034 | 571  | 455  | 437  | 440  | 414  | 579  | 434  | 426  | 371  | 529  | 552  | 510  |
| 1034 | 826  | 200  | 635  | 216  | 375  | 178  | 250  | 556  | 770   | 431  | 674  | 1248 | 1846 | 518  | 1339 | 385  | 1243 | 344  | 664  | 921  | 1537 | 950  | 1668 |
| 1586 | 1113 | 1389 | 1172 | 854  | 830  | 835  | 1143 | 752  | 948   | 2242 | 1581 | 1810 | 2329 | 3846 | 2773 | 2924 | 2785 | 2671 | 3028 | 1422 | 2105 | 3598 | 2841 |

Supplemental Figure 1

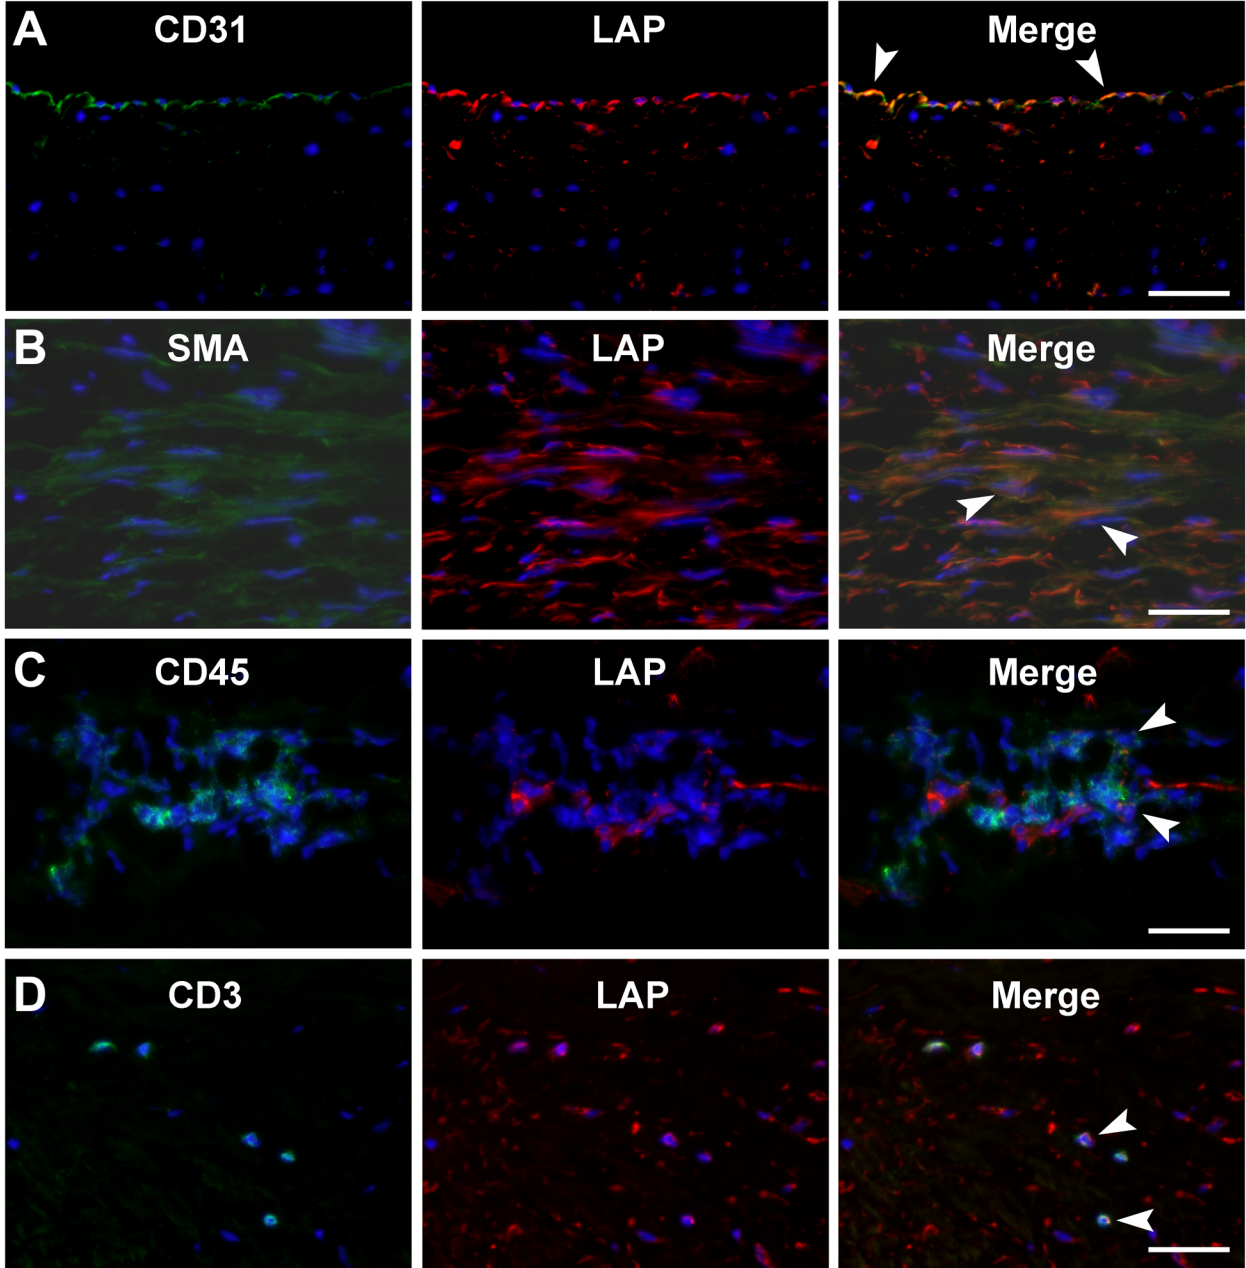

## Supplemental Figure 2

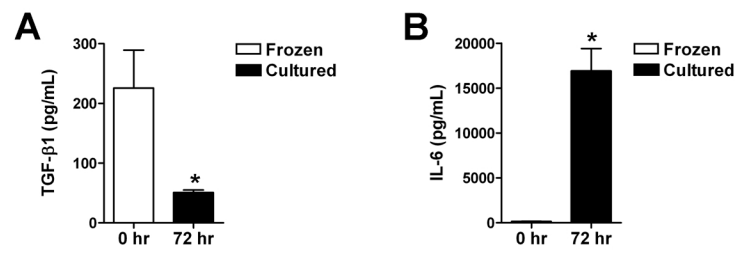

### Supplemental Figure 3

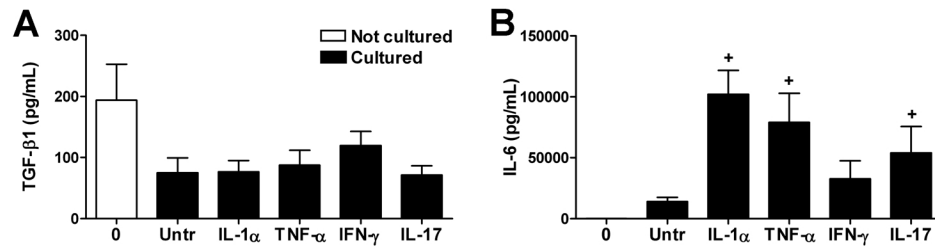

## Supplemental Figure 4

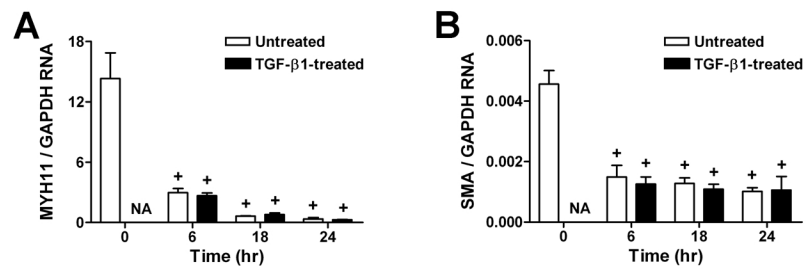

### Supplemental Figure 5

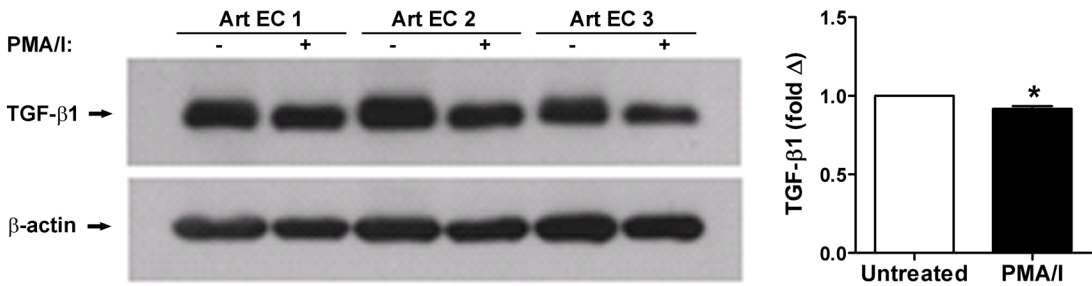



## Supplemental Figure 7

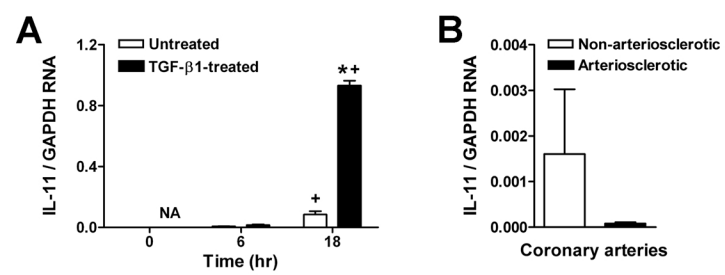

Supplement: NIHMS321208-supplement-01.pdf [file NIHMS321208-supplement-01.pdf]
